# Supplementary material for: Influenza Vaccination During Pregnancy: A Descriptive Cross-Sectional Study of the Knowledge, Beliefs, and Practices of Mexican Gynecologists and Family Physicians.
Source: Preprints.org preprint supplement (doi:10.20944/preprints202307.0165.v1), 2023-07-04
Supplement: Supplementary file 1 [file supplementary]

| **Questions** | **Responses** | **All** | **(%)** |
| --- | --- | --- | --- |
| ***Knowledge Section*** | | | |
| Seasonal influenza disease is an acute respiratory infection caused by the influenza virus, which circulates throughout the world? | True  False  I do not know | 199  5  2 | (96.6)  (2.4)  (1) |
| There are 4 types of seasonal influenza viruses, A, B, C, and D. But only type A and B viruses are responsible for seasonal outbreaks and epidemics of the disease. | True  False  I do not know | 151  31  24 | (73.3)  (15)  (11.7) |
| The clinical picture of Influenza disease is like the common flu, is rarely severe, and does not cause any death. | True  False  I do not know | 164  42  0 | (79.6  (20.4)  (0) |
| All age groups can be affected by seasonal influenza. However, there are higher risk groups that develop the disease and its complications. Such are: Children under 5 years of age, pregnant women, older adults, individuals with chronic diseases. | True  False  I do not know | 204  1  1 | (99)  (0.5)  (0.5) |
| The onset of seasonal influenza symptoms may occur suddenly or progress more slowly, and patients who received the vaccine may have milder symptoms. | True  False  I do not know | 185  13  8 | (89.8)  (6.3)  (3.9) |
| The standard criterion for confirming influenza virus infection remains a polymerase chain reaction with reverse transcription (PCR) or viral culture of nasopharyngeal or throat secretions. | True  False  I do not know | 178  15  13 | (86.4)  (7.3)  (6.3) |
| Antiviral medications for seasonal influenza include oseltamivir, zanamivir, and baloxavir marboxil. | True  False  I do not know | 150  37  19 | (72.8)  (18)  (9.2) |
| The most effective way to prevent infection and disease is through annual vaccination against the Influenza virus of all individuals at risk. | True  False  I do not know | 197  9  0 | (95.6)  (4.4)  (0) |
| Pregnant women tend to be frequently hospitalized due to the development of more severe illness and development of complications, and they can even die due to seasonal influenza, than women who are not pregnant. | True  False  I do not know | 152  35  19 | (73.8)  (17)  (9.2) |
| Some of the adverse effects of influenza infection in the fetus are the restriction of fetal growth, fetal distress, neural tube defects, preterm birth, increased fetal mortality. | True  False  I do not know | 100  55  51 | (48.5)  (26.7)  (24.8) |
| When is the best time to vaccinate pregnant women against seasonal influenza? | Any Trimester  1st  2nd  3rd | 117  49  27  13 | (56.8)  (23.8)  (13.1)  (6.3) |
| ***Beliefs Section*** | | | |
| Pregnancy per se is NOT a risk factor for developing influenza disease and its complications. | Strongly Agree  Agree  Neutral  Disagree  Strongly disagree | 47  34  18  43  64 | (22.8)  (16.5)  (8.7)  (20.9)  (31.1) |
| Influenza disease does NOT confer any health or developmental risk to the fetus. | Strongly Agree  Agree  Neutral  Disagree  Strongly disagree | 14  17  15  82  78 | (6.8)  (8.3)  (7.3)  (39.8)  (37.9) |
| The influenza vaccine is NOT safe and can cause influenza infection. | Strongly Agree  Agree  Neutral  Disagree  Strongly disagree | 1  1  11  63  130 | (0.5)  (0.5)  (5.3)  (30.6)  (63.1) |
| I have never treated a pregnant patient with influenza, so doubt the severity of this disease in this population. | Strongly Agree  Agree  Neutral  Disagree  Strongly disagree | 16  27  27  55  81 | (7.8)  (13.1)  (13.1)  (26.7)  (39.3) |
| Do you consider that vaccination against the influenza virus in pregnant women is a SAFE and EFFECTIVE practice to prevent the disease? | Strongly Agree  Agree  Neutral  Disagree  Strongly disagree | 155  43  5  2  1 | (75.2)  (20.9)  (2.4)  (1.0)  (0.5) |
| Only pregnant women with chronic degenerative diseases (DM, HBP, Lupus, etcetera.) are prone to contracting Influenza disease and its complications. | Strongly Agree  Agree  Neutral  Disagree  Strongly disagree | 22  19  4  66  95 | (10.7)  (9.2)  (1.9)  (32)  (46.1) |
| Influenza vaccination in pregnant women only gives protection to the mother, but not to the baby. | Strongly Agree  Agree  Neutral  Disagree  Strongly disagree | 22  19  4  66  95 | (10.7)  (9.2)  (1.9)  (32)  (46.1) |
| Pregnant women who were vaccinated against influenza reduce their risk of being hospitalized due to complications. | Strongly Agree  Agree  Neutral  Disagree  Strongly disagree | 133  58  4  7  4 | (64.6)  (28.2)  (1.9)  (3.4)  (1.9) |
| The Influenza vaccine can be applied in pregnant women during any trimester of pregnancy. | Strongly Agree  Agree  Neutral  Disagree  Strongly disagree | 113  43  13  25  12 | (54.9)  (20.9)  (6.3)  (12.1)  (5.8) |
| ***Practices Section*** | | | |
| Do you recommend and promote influenza vaccination during pregnancy? | Yes  No | 202  4 | (98.1)  (1.9) |
| Do you offer influenza vaccination among all your patients regardless of their pregnancy status (pregnant or not pregnant)? | Yes  No | 177  29 | (85.9)  (14.1) |
| Usually during which pregnancy trimester do you promote or apply influenza vaccination? | 1st  2nd  3rd | 91  93  22 | (44.2)  (45.1)  (10.7) |
| Do you check the immunization status of all your patients? | Always  Very often  Sometimes  Rarely  Never | 117  47  26  5  11 | (56.8)  (22.8)  (12.6)  (2.4)  (5.3) |
| Would you be interested in learning more about the benefits of influenza vaccination during pregnancy? | Yes  No | 198  8 | (96.1)  (3.9) |
| What challenges or barriers do you consider play a role in influenza vaccine uptake during pregnancy? | Open question |  |  |
